# Supplementary material for: Anomeric effect in N-azidomethylpyrrolidine: gas-phase electron diffraction and theoretical study
Source: Royal Society of Chemistry journal article supplement (doi:10.1039/c0cp00894j), 2010-12-07

## **Anomeric effect in N-azidomethylpyrrolidine: gas-phase electron diffraction and theoretical study**

Olga V. Dorofeeva,\* Alexander V. Mitin, Ekaterina P. Altova, Nikolai M. Karasev, Orudzh G. Nabiev, Lev V. Vilkov and Heinz Oberhammer

### **Electronic supplementary information**

Experimental conditions of gas-phase electron diffraction experiment (**Table S1**), experimental intensity curves with final backgrounds (**Table S2, Fig. S1, Fig. S2**), equilibrium distribution of AMP conformers (**Table S3**), molecular structure of *gauche-anti* conformer of AMP obtained by gas-phase electron diffraction and quantum chemical calculations (**Table S4**), molecular structure of *anti-gauche* conformer of AMP obtained by gas-phase electron diffraction and quantum chemical calculations (**Table S5**), vibrational amplitudes and vibrational corrections for non-hydrogen distances of *gauche-gauche* conformer calculated at different levels of theory (**Table S6**), vibrational amplitudes ( $u$ ) and harmonic ( $r_{\text{hl}} - r_{\text{a}}$ ) vibrational corrections obtained from the MP2/6-311+G(2df,p) force field for different conformers of AMP (**Table S7**), correlation matrix (**Table S8**), experimental coordinates of atoms for three conformers of AMP (**Table S9**).

**Table S1** Experimental conditions of gas-phase electron diffraction experiment

|                                                  | Long camera           | Short camera           |
|--------------------------------------------------|-----------------------|------------------------|
| Camera distance (mm)                             | 362.28                | 193.94                 |
| Nozzle temperature (K)                           | 295                   | 295                    |
| Accelerating voltage (kV)                        | 60                    | 60                     |
| Electron wavelength (Å)                          | 0.049503              | 0.049566               |
| Number of plates used                            | 3                     | 3                      |
| Range of s value (Å <sup>-1</sup> ) <sup>a</sup> | 3.8-17.6              | 8.0-33.0               |
| Scale factor                                     | 0.604(8) <sup>b</sup> | 0.674(13) <sup>b</sup> |

<sup>a</sup>  $s=4\pi\lambda^{-1}\sin\theta/2$ , where  $\theta$  is the scattering angle and  $\lambda$  is the electron wavelength. <sup>b</sup> Value in parenthesis is the estimated standard deviation.

**Table S2** Experimental intensity curves with backgrounds for AMP

| $s, \text{\AA}^{-1}$ | Intensity | Background |
|----------------------|-----------|------------|
| Long camera          |           |            |
| 3.8                  | 0.4274    | 0.4727     |
| 4.0                  | 0.4296    | 0.4810     |
| 4.2                  | 0.4350    | 0.4894     |
| 4.4                  | 0.4426    | 0.4964     |
| 4.6                  | 0.4560    | 0.5018     |
| 4.8                  | 0.4718    | 0.5055     |
| 5.0                  | 0.4950    | 0.5075     |
| 5.2                  | 0.5186    | 0.5076     |
| 5.4                  | 0.5385    | 0.5053     |
| 5.6                  | 0.5528    | 0.5011     |
| 5.8                  | 0.5593    | 0.4955     |
| 6.0                  | 0.5556    | 0.4893     |
| 6.2                  | 0.5409    | 0.4825     |
| 6.4                  | 0.5161    | 0.4750     |
| 6.6                  | 0.4852    | 0.4668     |
| 6.8                  | 0.4545    | 0.4581     |
| 7.0                  | 0.4298    | 0.4493     |
| 7.2                  | 0.4127    | 0.4406     |
| 7.4                  | 0.4029    | 0.4322     |
| 7.6                  | 0.3992    | 0.4241     |
| 7.8                  | 0.3990    | 0.4166     |
| 8.0                  | 0.4005    | 0.4094     |
| 8.2                  | 0.4019    | 0.4023     |
| 8.4                  | 0.4019    | 0.3954     |
| 8.6                  | 0.3995    | 0.3885     |
| 8.8                  | 0.3947    | 0.3818     |
| 9.0                  | 0.3866    | 0.3756     |
| 9.2                  | 0.3766    | 0.3700     |
| 9.4                  | 0.3659    | 0.3649     |
| 9.6                  | 0.3563    | 0.3603     |
| 9.8                  | 0.3486    | 0.3559     |
| 10.0                 | 0.3430    | 0.3515     |
| 10.2                 | 0.3395    | 0.3473     |
| 10.4                 | 0.3377    | 0.3433     |
| 10.6                 | 0.3365    | 0.3397     |
| 10.8                 | 0.3352    | 0.3364     |
| 11.0                 | 0.3329    | 0.3333     |
| 11.2                 | 0.3300    | 0.3303     |
| 11.4                 | 0.3263    | 0.3271     |
| 11.6                 | 0.3225    | 0.3238     |
| 11.8                 | 0.3189    | 0.3206     |
| 12.0                 | 0.3156    | 0.3173     |
| 12.2                 | 0.3129    | 0.3142     |
| 12.4                 | 0.3107    | 0.3112     |
| 12.6                 | 0.3091    | 0.3083     |
| 12.8                 | 0.3080    | 0.3054     |
| 13.0                 | 0.3076    | 0.3027     |

---

|      |        |        |
|------|--------|--------|
| 13.2 | 0.3072 | 0.3001 |
| 13.4 | 0.3065 | 0.2976 |
| 13.6 | 0.3047 | 0.2952 |
| 13.8 | 0.3016 | 0.2929 |
| 14.0 | 0.2971 | 0.2906 |
| 14.2 | 0.2918 | 0.2884 |
| 14.4 | 0.2857 | 0.2861 |
| 14.6 | 0.2799 | 0.2840 |
| 14.8 | 0.2749 | 0.2821 |
| 15.0 | 0.2716 | 0.2804 |
| 15.2 | 0.2697 | 0.2790 |
| 15.4 | 0.2694 | 0.2779 |
| 15.6 | 0.2698 | 0.2769 |
| 15.8 | 0.2710 | 0.2760 |
| 16.0 | 0.2724 | 0.2752 |
| 16.2 | 0.2734 | 0.2744 |
| 16.4 | 0.2744 | 0.2739 |
| 16.6 | 0.2752 | 0.2734 |
| 16.8 | 0.2759 | 0.2732 |
| 17.0 | 0.2764 | 0.2732 |
| 17.2 | 0.2771 | 0.2734 |
| 17.4 | 0.2776 | 0.2737 |
| 17.6 | 0.2780 | 0.2740 |

Short camera

|      |        |        |
|------|--------|--------|
| 8.0  | 0.4223 | 0.4328 |
| 8.2  | 0.4261 | 0.4263 |
| 8.4  | 0.4284 | 0.4197 |
| 8.6  | 0.4273 | 0.4132 |
| 8.8  | 0.4215 | 0.4068 |
| 9.0  | 0.4125 | 0.4008 |
| 9.2  | 0.4012 | 0.3951 |
| 9.4  | 0.3908 | 0.3898 |
| 9.6  | 0.3805 | 0.3849 |
| 9.8  | 0.3721 | 0.3802 |
| 10.0 | 0.3660 | 0.3757 |
| 10.2 | 0.3621 | 0.3713 |
| 10.4 | 0.3604 | 0.3670 |
| 10.6 | 0.3588 | 0.3629 |
| 10.8 | 0.3572 | 0.3590 |
| 11.0 | 0.3544 | 0.3552 |
| 11.2 | 0.3513 | 0.3515 |
| 11.4 | 0.3472 | 0.3479 |
| 11.6 | 0.3431 | 0.3443 |
| 11.8 | 0.3389 | 0.3407 |
| 12.0 | 0.3354 | 0.3372 |
| 12.2 | 0.3321 | 0.3338 |
| 12.4 | 0.3296 | 0.3304 |
| 12.6 | 0.3281 | 0.3272 |
| 12.8 | 0.3271 | 0.3240 |
| 13.0 | 0.3268 | 0.3210 |

---

---

|      |        |        |
|------|--------|--------|
| 13.2 | 0.3264 | 0.3180 |
| 13.4 | 0.3257 | 0.3151 |
| 13.6 | 0.3237 | 0.3123 |
| 13.8 | 0.3200 | 0.3095 |
| 14.0 | 0.3149 | 0.3067 |
| 14.2 | 0.3079 | 0.3039 |
| 14.4 | 0.3008 | 0.3011 |
| 14.6 | 0.2935 | 0.2983 |
| 14.8 | 0.2870 | 0.2955 |
| 15.0 | 0.2822 | 0.2929 |
| 15.2 | 0.2792 | 0.2904 |
| 15.4 | 0.2779 | 0.2880 |
| 15.6 | 0.2775 | 0.2857 |
| 15.8 | 0.2780 | 0.2836 |
| 16.0 | 0.2782 | 0.2815 |
| 16.2 | 0.2782 | 0.2795 |
| 16.4 | 0.2781 | 0.2776 |
| 16.6 | 0.2775 | 0.2758 |
| 16.8 | 0.2772 | 0.2740 |
| 17.0 | 0.2761 | 0.2723 |
| 17.2 | 0.2747 | 0.2706 |
| 17.4 | 0.2733 | 0.2690 |
| 17.6 | 0.2716 | 0.2673 |
| 17.8 | 0.2697 | 0.2657 |
| 18.0 | 0.2675 | 0.2641 |
| 18.2 | 0.2657 | 0.2624 |
| 18.4 | 0.2639 | 0.2608 |
| 18.6 | 0.2615 | 0.2591 |
| 18.8 | 0.2595 | 0.2575 |
| 19.0 | 0.2570 | 0.2559 |
| 19.2 | 0.2541 | 0.2543 |
| 19.4 | 0.2507 | 0.2528 |
| 19.6 | 0.2477 | 0.2513 |
| 19.8 | 0.2452 | 0.2498 |
| 20.0 | 0.2433 | 0.2484 |
| 20.2 | 0.2422 | 0.2471 |
| 20.4 | 0.2415 | 0.2458 |
| 20.6 | 0.2414 | 0.2446 |
| 20.8 | 0.2417 | 0.2435 |
| 21.0 | 0.2421 | 0.2425 |
| 21.2 | 0.2425 | 0.2415 |
| 21.4 | 0.2426 | 0.2406 |
| 21.6 | 0.2423 | 0.2397 |
| 21.8 | 0.2418 | 0.2388 |
| 22.0 | 0.2408 | 0.2380 |
| 22.2 | 0.2399 | 0.2371 |
| 22.4 | 0.2385 | 0.2363 |
| 22.6 | 0.2372 | 0.2355 |
| 22.8 | 0.2357 | 0.2347 |
| 23.0 | 0.2342 | 0.2339 |
| 23.2 | 0.2328 | 0.2331 |
| 23.4 | 0.2317 | 0.2324 |

---

---

|      |        |        |
|------|--------|--------|
| 23.6 | 0.2309 | 0.2317 |
| 23.8 | 0.2302 | 0.2310 |
| 24.0 | 0.2296 | 0.2303 |
| 24.2 | 0.2290 | 0.2297 |
| 24.4 | 0.2284 | 0.2291 |
| 24.6 | 0.2277 | 0.2285 |
| 24.8 | 0.2272 | 0.2280 |
| 25.0 | 0.2265 | 0.2274 |
| 25.2 | 0.2263 | 0.2269 |
| 25.4 | 0.2258 | 0.2265 |
| 25.6 | 0.2257 | 0.2260 |
| 25.8 | 0.2254 | 0.2256 |
| 26.0 | 0.2255 | 0.2253 |
| 26.2 | 0.2253 | 0.2250 |
| 26.4 | 0.2253 | 0.2247 |
| 26.6 | 0.2252 | 0.2245 |
| 26.8 | 0.2251 | 0.2244 |
| 27.0 | 0.2250 | 0.2242 |
| 27.2 | 0.2246 | 0.2241 |
| 27.4 | 0.2246 | 0.2241 |
| 27.6 | 0.2240 | 0.2240 |
| 27.8 | 0.2239 | 0.2240 |
| 28.0 | 0.2237 | 0.2240 |
| 28.2 | 0.2237 | 0.2240 |
| 28.4 | 0.2238 | 0.2241 |
| 28.6 | 0.2238 | 0.2243 |
| 28.8 | 0.2242 | 0.2245 |
| 29.0 | 0.2246 | 0.2247 |
| 29.2 | 0.2251 | 0.2250 |
| 29.4 | 0.2258 | 0.2254 |
| 29.6 | 0.2260 | 0.2259 |
| 29.8 | 0.2266 | 0.2263 |
| 30.0 | 0.2270 | 0.2269 |
| 30.2 | 0.2275 | 0.2274 |
| 30.4 | 0.2280 | 0.2281 |
| 30.6 | 0.2287 | 0.2287 |
| 30.8 | 0.2293 | 0.2294 |
| 31.0 | 0.2298 | 0.2301 |
| 31.2 | 0.2305 | 0.2308 |
| 31.4 | 0.2315 | 0.2316 |
| 31.6 | 0.2321 | 0.2324 |
| 31.8 | 0.2329 | 0.2332 |
| 32.0 | 0.2338 | 0.2341 |
| 32.2 | 0.2347 | 0.2350 |
| 32.4 | 0.2361 | 0.2360 |
| 32.6 | 0.2373 | 0.2370 |
| 32.8 | 0.2381 | 0.2380 |
| 33.0 | 0.2392 | 0.2390 |

---

**Table S3** Equilibrium distribution of AMP conformers <sup>a</sup>

| Method                        | Conformer            | $\varphi_1$ | $\varphi_2$ | $\varphi_3$ | $\Delta E_e$ | $\Delta H$ | $S_{298}$ | $\Delta G_{298}$ | $p_{298}$ |
|-------------------------------|----------------------|-------------|-------------|-------------|--------------|------------|-----------|------------------|-----------|
| B3LYP/6-31G(d,p) <sup>b</sup> | <i>gauche-gauche</i> | 62.6        | 103.8       | 15.1        | 0.0          | 0.3        | 412.0     | 1.1              | 37.9      |
|                               | <i>gauche-anti</i>   | 63.5        | 180.0       | 0.0         | 0.1          | 0.0        | 414.8     | 0.0              | 59.4      |
|                               | <i>anti-gauche</i>   | 169.0       | -59.2       | 0.1         | 6.3          | 6.2        | 409.0     | 7.9              | 2.4       |
|                               | <i>anti-anti</i>     | 167.8       | 151.5       | -1.8        | 13.2         | 12.5       | 411.7     | 13.4             | 0.3       |
| B3LYP/cc-pVTZ                 | <i>gauche-gauche</i> | 63.4        | 102.9       | 12.2        | 0.6          | 1.0        | 408.6     | 1.3              | 35.0      |
|                               | <i>gauche-anti</i>   | 64.1        | 180.0       | 0.0         | 0.0          | 0.0        | 409.6     | 0.0              | 59.5      |
|                               | <i>anti-gauche</i>   | 167.9       | -60.8       | -0.1        | 5.8          | 5.8        | 406.9     | 6.6              | 4.2       |
|                               | <i>anti-gauche-2</i> | 165.0       | 101.8       | 2.0         | 12.6         | 12.1       | 413.2     | 10.7             | 0.6       |
|                               | <i>anti-anti</i>     | 167.6       | 160.7       | -0.8        | 11.9         | 11.2       | 408.9     | 11.4             | 0.7       |
| B3LYP/6-311+G(3df,2p)         | <i>gauche-gauche</i> | 63.7        | 104.5       | 0.4         | 0.4          | 0.6        | 410.6     | 0.0              | 53.5      |
|                               | <i>gauche-anti</i>   | 64.3        | 180.0       | 0.0         | 0.0          | 0.0        | 406.3     | 0.7              | 40.7      |
|                               | <i>anti-gauche</i>   | 167.2       | -59.5       | 0.7         | 5.3          | 5.2        | 405.6     | 6.1              | 4.5       |
|                               | <i>anti-gauche-2</i> | 165.4       | 102.1       | 1.5         | 12.1         | 11.7       | 409.6     | 11.4             | 0.7       |
|                               | <i>anti-anti</i>     | 168.2       | 164.9       | -0.7        | 11.6         | 10.9       | 408.6     | 10.9             | 0.6       |
| MP2/6-311+G(d,p)              | <i>gauche-gauche</i> | 61.2        | 90.0        | 4.0         | 0.0          | 0.0        | 401.6     | 0.0              | 50.0      |
|                               | <i>gauche-anti</i>   | 61.2        | 180.0       | 0.0         | 2.3          | 1.9        | 403.4     | 1.4              | 28.6      |
|                               | <i>anti-gauche</i>   | 173.9       | -55.7       | -0.1        | 3.0          | 2.7        | 403.2     | 2.2              | 20.3      |
|                               | <i>anti-gauche-2</i> | 174.0       | 86.2        | 2.9         | 11.8         | 11.3       | 402.9     | 10.9             | 0.6       |
|                               | <i>anti-anti</i>     | 175.7       | 170.2       | 0.3         | 14.3         | 13.1       | 408.3     | 11.1             | 0.5       |
| MP2/6-311+G(2df,p)            | <i>gauche-gauche</i> | 61.1        | 91.2        | 6.0         | 0.0          | 0.0        | 403.2     | 0.0              | 55.4      |
|                               | <i>gauche-anti</i>   | 61.2        | 180.0       | 0.0         | 2.5          | 2.0        | 404.9     | 1.5              | 30.4      |
|                               | <i>anti-gauche</i>   | 175.0       | -55.7       | 0.4         | 4.6          | 4.2        | 405.3     | 3.6              | 13.1      |
|                               | <i>anti-gauche-2</i> | 174.1       | 88.1        | 3.5         | 11.4         | 11.0       | 403.1     | 11.0             | 0.6       |
|                               | <i>anti-anti</i>     | 175.5       | 171.1       | -0.5        | 14.2         | 13.1       | 408.4     | 11.6             | 0.5       |
| MP2/cc-pVTZ                   | <i>gauche-gauche</i> | 60.6        | 91.2        | 8.2         | 0.0          | 0.0        | 405.5     | 0.0              | 45.0      |
|                               | <i>gauche-anti</i>   | 60.8        | 180.0       | 0.0         | 2.6          | 2.0        | 411.9     | 0.1              | 44.0      |
|                               | <i>anti-gauche</i>   | 175.7       | -57.0       | -1.6        | 4.9          | 4.5        | 407.9     | 3.8              | 9.9       |
|                               | <i>anti-gauche-2</i> | 174.4       | 87.8        | 2.4         | 11.2         | 10.7       | 405.3     | 10.8             | 0.6       |

|                              |                      |                    |                    |                  |      |      |       |      |        |
|------------------------------|----------------------|--------------------|--------------------|------------------|------|------|-------|------|--------|
| MP2/aug-cc-pVTZ <sup>c</sup> | <i>anti-anti</i>     | 175.2              | 163.9              | 0.5              | 13.8 | 12.8 | 411.4 | 11.0 | 0.5    |
|                              | <i>gauche-gauche</i> | 60.7               | 91.9               | 3.4              | 0.   | 0.   | 405.5 | 0.0  | 49.1   |
|                              | <i>gauche-anti</i>   | 60.8               | 180.0              | 0.               | 3.0  | 2.4  | 411.9 | 0.6  | 39.0   |
|                              | <i>anti-gauche</i>   | 175.9              | -55.3              | -0.1             | 4.9  | 4.5  | 407.9 | 3.7  | 10.8   |
|                              | <i>anti-gauche-2</i> | 175.1              | 87.9               | 2.3              | 11.2 | 10.7 | 405.3 | 10.8 | 0.6    |
|                              | <i>anti-anti</i>     | 176.0              | 168.2              | 0.2              | 14.2 | 13.1 | 411.4 | 11.4 | 0.5    |
| GED                          | <i>gauche-gauche</i> | 61.1 <sup>d</sup>  | 96.5(45)           | 6.0 <sup>d</sup> |      |      |       |      | 68 ± 7 |
|                              | <i>gauche-anti</i>   | 61.2 <sup>d</sup>  | 180.0 <sup>d</sup> | 0.0 <sup>d</sup> |      |      |       |      | 15 ± 7 |
|                              | <i>anti-gauche</i>   | 175.0 <sup>d</sup> | -55.7 <sup>d</sup> | 0.4 <sup>d</sup> |      |      |       |      | 17 ± 7 |

<sup>a</sup> Torsional angles  $\varphi_1 = \varphi(\text{N3-C4-N5-C7})$ ,  $\varphi_2 = \varphi(\text{N2-N3-C4-N5})$ ,  $\varphi_3 = \varphi(\text{C6-C8-C9-C7})$  in degrees;  $\Delta E_e$  (kJ/mol) is the relative electronic energy;  $H = E_e + \text{ZPE}$  (kJ/mol), where ZPE is the zero point energy correction calculated from scaled vibrational frequencies;  $S_{298}$  (J/(K mol)) is the entropy value at 298 K calculated using scaled frequencies and including the entropy of mixing ( $R \ln 2$ ) for conformers with  $C_1$  symmetry, which are present as an equimolar mixture of the two optical isomers;  $\Delta G_T(i) = \Delta H(i) + T \Delta S_T(i)$  is the Gibbs free energy difference (kJ/mol);

$p_T(i) = [\exp(-\Delta G_T(i) / RT)] / [\sum_i \exp(-\Delta G_T(i) / RT)]$  is the mole fraction of conformers (%).<sup>b</sup> *Anti-gauche-2* conformer was not detected at this level

of theory. <sup>c</sup> Values of ZPE and vibrational frequencies from MP2/cc-pVTZ calculation are used. <sup>d</sup> Assumed at the value from MP2/6-311+G(2df,p) calculation.



**Table S4** Molecular structure of *gauche-anti* conformer of AMP obtained by gas-phase electron diffraction and quantum chemical calculations

| Parameter <sup>a</sup>                                         | GED<br>single conformer<br>model<br>$r_{\text{hl}}(\angle_{\text{hl}})^b$ | GED<br>mixture<br>of conformers<br>$r_{\text{hl}}(\angle_{\text{hl}})^b$ | B3LYP<br>/cc-pVTZ<br>$r_e(\angle_e)$ | MP2<br>/6-311+G(2df,p)<br>$r_e(\angle_e)$ |
|----------------------------------------------------------------|---------------------------------------------------------------------------|--------------------------------------------------------------------------|--------------------------------------|-------------------------------------------|
| <i>Independent parameters</i>                                  |                                                                           |                                                                          |                                      |                                           |
| $r(\text{N1-N2})$                                              | 1.154(4)                                                                  | 1.158(2)                                                                 | 1.134                                | 1.153                                     |
| $r(\text{N2-N3})$                                              | 1.218(5)                                                                  | 1.231(2)                                                                 | 1.221                                | 1.228                                     |
| $r(\text{C4-N3})$                                              | 1.497(4)                                                                  | 1.505(10)                                                                | 1.524                                | 1.515                                     |
| $r(\text{C4-N5})$                                              | 1.389(7)                                                                  | 1.394(8)                                                                 | 1.411                                | 1.413                                     |
| $r(\text{C6-N5}) = r(\text{C7-N5})$                            | 1.472(4)                                                                  | 1.478(7)                                                                 | 1.463                                | 1.461                                     |
| $r(\text{C6-C8}) = r(\text{C7-C9})$                            | 1.539(4) <sup>1</sup>                                                     | 1.543(3) <sup>1</sup>                                                    | 1.536                                | 1.529                                     |
| $r(\text{C8-C9})$                                              | 1.559(4) <sup>1</sup>                                                     | 1.563(3) <sup>1</sup>                                                    | 1.554                                | 1.549                                     |
| $r(\text{C-H})_{\text{av}}$                                    | 1.094(8) <sup>c</sup>                                                     | 1.099(4) <sup>c</sup>                                                    | 1.092                                | 1.094                                     |
| $\angle\text{N1-N2-N3}$                                        | 175.6 <sup>d</sup>                                                        | 175.6 <sup>d</sup>                                                       | 176.2                                | 175.6                                     |
| $\angle\text{C4-N3-N2}$                                        | 117.7(7) <sup>2</sup>                                                     | 116.6(5) <sup>2</sup>                                                    | 114.7                                | 114.0                                     |
| $\angle\text{N3-C4-N5}$                                        | 114.7(7) <sup>2</sup>                                                     | 113.0(5) <sup>2</sup>                                                    | 112.0                                | 111.0                                     |
| $\angle\text{C4-N5-C6} = \angle\text{C4-N5-C7}$                | 119.3(7) <sup>2</sup>                                                     | 116.7(5) <sup>2</sup>                                                    | 117.3                                | 115.6                                     |
| $\angle\text{C6-C8-C9} = \angle\text{C7-C9-C8}$                | 104.4(7)                                                                  | 104.4 <sup>d</sup>                                                       | 104.8                                | 104.4                                     |
| $\varphi(\text{N5-C6-C7-C9})$                                  | 141.5(26)                                                                 | 134.7 <sup>d</sup>                                                       | 138.9                                | 134.7                                     |
| $\varphi(\text{N1-N2-N3-C4})$                                  | 180                                                                       | 180                                                                      | 180                                  | 180                                       |
| $\varphi_2(\text{N2-N3-C4-N5})$                                | 180                                                                       | 180                                                                      | 180                                  | 180                                       |
| mole fraction:                                                 |                                                                           |                                                                          |                                      |                                           |
| <i>gauche-gauche</i>                                           |                                                                           | 68(7)                                                                    |                                      |                                           |
| <i>gauche-anti</i>                                             | 100                                                                       | 15(7)                                                                    |                                      |                                           |
| <i>anti-gauche</i>                                             |                                                                           | 17(7)                                                                    |                                      |                                           |
| <i>Dependent parameters</i>                                    |                                                                           |                                                                          |                                      |                                           |
| $\angle\text{N5-C6-C8} = \angle\text{N5-C7-C9}$                | 105.5(20)                                                                 | 102.9(5)                                                                 | 103.5                                | 102.8                                     |
| $\angle\text{C6-N5-C7}$                                        | 104.4(17)                                                                 | 104.0(9)                                                                 | 106.2                                | 104.4                                     |
| $\varphi_1(\text{N3-C4-N5-C7}) = -\varphi(\text{N3-C4-N5-C6})$ | 64.9(26)                                                                  | 61.8(17)                                                                 | 64.1                                 | 61.2                                      |

|                                                             |           |          |       |       |
|-------------------------------------------------------------|-----------|----------|-------|-------|
| $\varphi(\text{C7-N5-C6-C8}) = \varphi(\text{C6-N5-C7-C9})$ | -38.7(27) | -44.9(5) | -40.8 | -44.9 |
| $\varphi(\text{N5-C6-C8-C9}) = \varphi(\text{N5-C7-C9-C8})$ | 23.3(18)  | 26.7(3)  | 24.0  | 26.5  |
| $\varphi_3(\text{C6-C8-C9-C7})$                             | 0         | 0        | 0     | 0     |
| $R_L$                                                       | 8.5       | 1.5      |       |       |
| $R_S$                                                       | 9.9       | 6.4      |       |       |
| $R_{\text{tot}}$                                            | 9.1       | 4.2      |       |       |

<sup>a</sup> Bond lengths are in Å, bond angles and torsional angles ( $\varphi$ ) are in degrees, mole fraction in %. Together with total value of the disagreement factor ( $R_{\text{tot}}$ ), the  $R$  factors (in %) are given for long ( $R_L$ ) and short ( $R_S$ ) camera distances. <sup>b</sup> Values in parentheses are three times the standard deviations. The same numeric superscripts indicate that these parameters were refined in one group; differences between parameters in the group were assumed at the values from MP2/6-311+G(2df,p) calculation. <sup>c</sup> All C–H bond lengths were refined in one group; their average value is given in the Table. <sup>d</sup> Assumed at the value from MP2/6-311+G(2df,p) calculation.

**TABLE S5** Molecular structure of *anti-gauche* conformer of AMP obtained by gas-phase electron diffraction and quantum chemical calculations

| Parameter <sup>a</sup>        | GED<br>single conformer<br>model<br>$r_{h1}(\angle_{h1})^b$ | GED<br>mixture<br>of conformers<br>$r_{h1}(\angle_{h1})^b$ | B3LYP<br>/cc-pVTZ<br>$r_e(\angle_e)$ | MP2<br>/6-311+G(2df,p)<br>$r_e(\angle_e)$ |
|-------------------------------|-------------------------------------------------------------|------------------------------------------------------------|--------------------------------------|-------------------------------------------|
| <i>independent parameters</i> |                                                             |                                                            |                                      |                                           |
| $r(N1-N2)$                    | 1.157(5)                                                    | 1.154(2)                                                   | 1.129                                | 1.149                                     |
| $r(N2-N3)$                    | 1.240(5)                                                    | 1.239(2)                                                   | 1.229                                | 1.236                                     |
| $r(C4-N3)$                    | 1.466(7) <sup>1</sup>                                       | 1.463(10)                                                  | 1.477                                | 1.472                                     |
| $r(C4-N5)$                    | 1.433(7) <sup>1</sup>                                       | 1.420(8)                                                   | 1.441                                | 1.438                                     |
| $r(C6-N5)$                    | 1.490(6) <sup>2</sup>                                       | 1.478(7) <sup>1</sup>                                      | 1.464                                | 1.461                                     |
| $r(C7-N5)$                    | 1.490(6) <sup>2</sup>                                       | 1.478(7) <sup>1</sup>                                      | 1.464                                | 1.461                                     |
| $r(C6-C8)$                    | 1.543(7) <sup>3</sup>                                       | 1.542(3) <sup>2</sup>                                      | 1.536                                | 1.529                                     |
| $r(C7-C9)$                    | 1.543(7) <sup>3</sup>                                       | 1.543(3) <sup>2</sup>                                      | 1.535                                | 1.529                                     |
| $r(C8-C9)$                    | 1.562(7) <sup>3</sup>                                       | 1.561(3) <sup>2</sup>                                      | 1.553                                | 1.548                                     |
| $r(C-H)_{av}$                 | 1.113(7) <sup>c</sup>                                       | 1.110(4) <sup>c</sup>                                      | 1.093                                | 1.095                                     |
| $\angle N1-N2-N3$             | 173.4 <sup>d</sup>                                          | 173.4 <sup>d</sup>                                         | 173.6                                | 173.4                                     |
| $\angle C4-N3-N2$             | 114.7(6) <sup>4</sup>                                       | 115.5(6) <sup>3</sup>                                      | 115.0                                | 113.5                                     |
| $\angle N3-C4-N5$             | 112.6(6) <sup>4</sup>                                       | 113.4(6) <sup>3</sup>                                      | 112.6                                | 111.4                                     |
| $\angle C4-N5-C6$             | 113.8(6) <sup>4</sup>                                       | 113.7(5) <sup>4</sup>                                      | 114.3                                | 112.6                                     |
| $\angle C4-N5-C7$             | 114.9(6) <sup>4</sup>                                       | 114.8(5) <sup>4</sup>                                      | 115.4                                | 113.7                                     |
| $\angle N5-C6-C8$             | 103.1(16)                                                   | 103.0 <sup>d</sup>                                         | 103.6                                | 103.0                                     |
| $\varphi(N1-N2-N3-C4)$        | 177.2 <sup>d</sup>                                          | 177.2 <sup>d</sup>                                         | 179.6                                | 177.2                                     |
| $\varphi_2(N2-N3-C4-N5)$      | -55.7 <sup>d</sup>                                          | -55.7 <sup>d</sup>                                         | -60.8                                | -55.7                                     |
| $\varphi(N3-C4-N5-C6)$        | -67.4 <sup>d</sup>                                          | -67.4 <sup>d</sup>                                         | -70.0                                | -67.4                                     |
| $\varphi_1(N3-C4-N5-C7)$      | 175.0 <sup>d</sup>                                          | 175.0 <sup>d</sup>                                         | 167.9                                | 175.0                                     |
| $\varphi(C7-N5-C6-C8)$        | -45.5 <sup>d</sup>                                          | -45.5 <sup>d</sup>                                         | -42.1                                | -45.5                                     |
| $\varphi(C6-C8-C7-C9)$        | 179.6 <sup>d</sup>                                          | 179.6 <sup>d</sup>                                         | 179.9                                | 179.6                                     |
| mole fraction:                |                                                             |                                                            |                                      |                                           |
| <i>gauche-gauche</i>          |                                                             | 68(7)                                                      |                                      |                                           |
| <i>gauche-anti</i>            |                                                             | 15(7)                                                      |                                      |                                           |
| <i>anti-gauche</i>            | 100                                                         | 17(7)                                                      |                                      |                                           |
| <i>dependent parameters</i>   |                                                             |                                                            |                                      |                                           |
| $\angle N5-C7-C9$             | 103.4(13)                                                   | 104.0(10)                                                  | 103.6                                | 103.0                                     |
| $\angle C6-C8-C9$             | 104.6(20)                                                   | 104.9(7)                                                   | 104.6                                | 104.2                                     |
| $\angle C7-C9-C8$             | 103.9(16)                                                   | 103.1(12)                                                  | 104.6                                | 104.3                                     |
| $\angle C6-N5-C7$             | 102.4(8)                                                    | 102.6(8)                                                   | 105.2                                | 103.8                                     |
| $\varphi(C6-N5-C7-C9)$        | 45.9(5)                                                     | 46.3(3)                                                    | 42.2                                 | 45.3                                      |
| $\varphi(N5-C6-C8-C9)$        | 27.3(3)                                                     | 27.2(5)                                                    | 24.8                                 | 27.3                                      |
| $\varphi(N5-C7-C9-C8)$        | -27.9(3)                                                    | -27.9(3)                                                   | -25.0                                | -26.7                                     |
| $\varphi_3(C6-C8-C9-C7)$      | -0.4(2)                                                     | -0.4(2)                                                    | -0.1                                 | 0.4                                       |
| $R_L$                         | 9.7                                                         | 1.5                                                        |                                      |                                           |
| $R_S$                         | 9.6                                                         | 6.4                                                        |                                      |                                           |
| $R_{tot}$                     | 9.6                                                         | 4.2                                                        |                                      |                                           |

<sup>a</sup> Bond lengths are in Å, bond angles and torsional angles ( $\varphi$ ) are in degrees, mole fraction in %. Together with total value of the disagreement factor ( $R_{tot}$ ), the  $R$  factors (in %) are given for long

( $R_L$ ) and short ( $R_S$ ) camera distances. <sup>b</sup> Values in parentheses are three times the standard deviations. The same numeric superscripts indicate that these parameters were refined in one group; differences between parameters in the group were assumed at the values from MP2/6-311+G(2df,p) calculation. <sup>c</sup> All C–H bond lengths were refined in one group; their average value is given in the Table. <sup>d</sup> Assumed at the value from MP2/6-311+G(2df,p) calculation.

**Table S6** Vibrational amplitudes and vibrational corrections for non-hydrogen distances of *gauche-gauche* conformer calculated at different levels of theory <sup>a</sup>

| Distance | $r_a$ | B3LYP/cc-pVTZ |                | MP2/cc-pVTZ  |                | MP2/6-311+G(2df,p) <sup>b</sup> |                |
|----------|-------|---------------|----------------|--------------|----------------|---------------------------------|----------------|
|          |       | $u$           | $r_{hl} - r_a$ | $u$          | $r_{hl} - r_a$ | $u$                             | $r_{hl} - r_a$ |
| N1–N2    | 1.146 | 0.034         | 0.0010         | 0.034        | 0.0004         | 0.034                           | 0.0004         |
| N2–N3    | 1.234 | 0.039         | -0.0032        | 0.038        | -0.0022        | 0.038                           | -0.0022        |
| C4–N5    | 1.413 | 0.049         | -0.0029        | 0.049        | -0.0017        | 0.049                           | -0.0017        |
| N5–C6    | 1.468 | 0.050         | -0.0053        | 0.050        | -0.0053        | 0.049                           | -0.0038        |
| N5–C7    | 1.472 | 0.051         | -0.0005        | 0.050        | -0.0025        | 0.050                           | -0.0023        |
| N3–C4    | 1.507 | 0.059         | 0.0064         | 0.057        | 0.0050         | 0.057                           | 0.0050         |
| C6–C8    | 1.536 | 0.053         | -0.0032        | 0.053        | -0.0009        | 0.053                           | 0.0001         |
| C7–C9    | 1.546 | 0.054         | 0.0072         | 0.054        | 0.0051         | 0.054                           | 0.0035         |
| C8–C9    | 1.552 | 0.054         | 0.0051         | 0.053        | 0.0066         | 0.053                           | 0.0055         |
| N2…C4    | 2.328 | 0.068         | -0.0028        | 0.070        | -0.0058        | 0.070                           | -0.0048        |
| N5…C8    | 2.328 | 0.070         | 0.0098         | 0.077        | 0.0151         | 0.075                           | 0.0140         |
| C6…C7    | 2.356 | 0.074         | 0.0099         | 0.069        | 0.0047         | 0.065                           | 0.0030         |
| N5…C9    | 2.360 | 0.077         | 0.0352         | 0.086        | 0.0296         | 0.080                           | 0.0219         |
| N1…N3    | 2.370 | 0.043         | 0.0065         | 0.044        | 0.0061         | 0.044                           | 0.0059         |
| C6…C9    | 2.408 | 0.081         | 0.0277         | 0.083        | 0.0347         | 0.077                           | 0.0289         |
| C7…C8    | 2.435 | 0.072         | 0.0451         | 0.075        | 0.0452         | 0.072                           | 0.0346         |
| C4…C7    | 2.453 | 0.069         | -0.0068        | 0.069        | -0.0078        | 0.069                           | -0.0059        |
| N3…N5    | 2.459 | 0.071         | -0.0004        | 0.067        | 0.0018         | 0.067                           | 0.0016         |
| C4…C6    | 2.463 | 0.070         | -0.0099        | 0.069        | -0.0099        | 0.069                           | -0.0073        |
| N3…C7    | 3.037 | 0.137         | -0.0068        | 0.128        | -0.0048        | 0.129                           | -0.0028        |
| N3…C6    | 3.087 | 0.144         | -0.0129        | 0.132        | -0.0136        | 0.130                           | -0.0111        |
| N2…N5    | 3.188 | <u>0.170</u>  | <u>0.0445</u>  | <u>0.121</u> | <u>0.0096</u>  | <u>0.120</u>                    | <u>0.0112</u>  |
| N2…C6    | 3.337 | <u>0.297</u>  | <u>0.0466</u>  | <u>0.192</u> | <u>-0.0090</u> | <u>0.192</u>                    | <u>-0.0039</u> |
| N1…C4    | 3.382 | 0.092         | -0.0362        | 0.098        | -0.0265        | 0.098                           | -0.0249        |
| C4…C8    | 3.668 | 0.072         | 0.0090         | 0.074        | 0.0138         | 0.073                           | 0.0139         |
| C4…C9    | 3.674 | 0.075         | 0.0416         | 0.076        | 0.0363         | 0.074                           | 0.0269         |
| N2…C7    | 3.963 | <u>0.215</u>  | <u>0.0810</u>  | <u>0.171</u> | <u>0.0302</u>  | <u>0.170</u>                    | <u>0.0324</u>  |
| N1…C6    | 3.994 | <u>0.463</u>  | <u>0.0661</u>  | <u>0.294</u> | <u>-0.0254</u> | <u>0.291</u>                    | <u>-0.0188</u> |
| N1…N5    | 4.151 | <u>0.251</u>  | <u>0.0395</u>  | <u>0.181</u> | <u>-0.0059</u> | <u>0.178</u>                    | <u>-0.0031</u> |
| N3…C9    | 4.261 | 0.179         | 0.0368         | 0.158        | 0.0396         | 0.145                           | 0.0298         |
| N3…C8    | 4.346 | 0.138         | 0.0087         | 0.126        | 0.0124         | 0.126                           | 0.0119         |
| N2…C8    | 4.742 | 0.302         | <u>0.0755</u>  | 0.193        | <u>0.0160</u>  | 0.193                           | <u>0.0203</u>  |
| N2…C9    | 4.956 | 0.295         | <u>0.1338</u>  | 0.239        | <u>0.0795</u>  | 0.221                           | <u>0.0693</u>  |
| N1…C7    | 4.969 | <u>0.306</u>  | <u>0.1273</u>  | <u>0.232</u> | <u>0.0479</u>  | <u>0.229</u>                    | <u>0.0503</u>  |
| N1…C8    | 5.408 | <u>0.499</u>  | <u>0.1132</u>  | <u>0.318</u> | <u>0.0035</u>  | <u>0.314</u>                    | <u>0.0113</u>  |
| N1…C9    | 5.800 | <u>0.448</u>  | <u>0.1970</u>  | <u>0.346</u> | <u>0.1007</u>  | <u>0.324</u>                    | <u>0.0904</u>  |

<sup>a</sup> Values of distances ( $r_a$ ), amplitudes ( $u$ ), and vibrational corrections ( $r_{hl}-r_a$ ) are in Å. The amplitudes and vibrational corrections for which the B3LYP calculation gives the overestimated values are underlined. <sup>b</sup> These amplitudes and vibrational corrections were used in GED analysis.

**Table S7** Vibrational amplitudes ( $u$ ) and harmonic ( $r_{hl} - r_a$ ) vibrational corrections (in Å) obtained from the MP2/6-311+G(2df,p) force field for different conformers of AMP

| Distance                              |     | $r_a$    | $u$      | $r_{hl} - r_a$ |
|---------------------------------------|-----|----------|----------|----------------|
| <b><i>gauche-gauche</i> conformer</b> |     |          |          |                |
| C4                                    | H10 | 1.106480 | 0.075900 | 0.001050       |
| C9                                    | H18 | 1.106827 | 0.076200 | 0.001370       |
| C8                                    | H17 | 1.106955 | 0.076100 | 0.001410       |
| C9                                    | H19 | 1.107077 | 0.076200 | 0.001390       |
| C8                                    | H16 | 1.107579 | 0.076200 | 0.001330       |
| C7                                    | H14 | 1.109126 | 0.076300 | 0.001310       |
| C6                                    | H12 | 1.109325 | 0.076400 | 0.001360       |
| C4                                    | H11 | 1.109630 | 0.076600 | 0.001480       |
| C7                                    | H15 | 1.115852 | 0.077700 | 0.001050       |
| C6                                    | H13 | 1.119122 | 0.077900 | 0.000960       |
| N1                                    | N2  | 1.146843 | 0.033900 | 0.000390       |
| N2                                    | N3  | 1.230807 | 0.038100 | -0.002170      |
| C4                                    | N5  | 1.401422 | 0.048500 | -0.001660      |
| N5                                    | C6  | 1.475032 | 0.049300 | -0.003780      |
| N5                                    | C7  | 1.479009 | 0.049500 | -0.002300      |
| N3                                    | C4  | 1.504468 | 0.056800 | 0.005010       |
| C6                                    | C8  | 1.533784 | 0.052600 | 0.000080       |
| C7                                    | C9  | 1.544224 | 0.053600 | 0.003460       |
| C8                                    | C9  | 1.549611 | 0.052500 | 0.005460       |
| H18                                   | H19 | 1.778637 | 0.122500 | 0.005200       |
| H16                                   | H17 | 1.785611 | 0.122800 | 0.005530       |
| H14                                   | H15 | 1.793694 | 0.122200 | 0.005340       |
| H12                                   | H13 | 1.798551 | 0.122400 | 0.005610       |
| H10                                   | H11 | 1.798836 | 0.122300 | 0.010270       |
| N5                                    | H11 | 1.990577 | 0.101300 | 0.005680       |
| N3                                    | H10 | 2.072518 | 0.105600 | 0.010610       |
| N5                                    | H10 | 2.105672 | 0.100600 | 0.005300       |
| N5                                    | H14 | 2.129739 | 0.103500 | -0.000290      |
| N5                                    | H12 | 2.133558 | 0.103300 | -0.001700      |
| N3                                    | H11 | 2.134469 | 0.104000 | 0.006280       |
| N5                                    | H15 | 2.147099 | 0.102000 | 0.002080       |
| N5                                    | H13 | 2.154814 | 0.102600 | 0.001660       |
| C6                                    | H16 | 2.169703 | 0.112100 | 0.004330       |
| C8                                    | H13 | 2.188466 | 0.106400 | 0.007350       |
| C9                                    | H16 | 2.193208 | 0.106700 | 0.009670       |
| C7                                    | H19 | 2.193329 | 0.107600 | 0.004170       |
| C9                                    | H15 | 2.198464 | 0.106500 | 0.008160       |
| C7                                    | H18 | 2.203617 | 0.116500 | 0.005480       |
| C6                                    | H17 | 2.204589 | 0.107900 | 0.002080       |
| C8                                    | H18 | 2.204622 | 0.107400 | 0.007910       |
| C8                                    | H19 | 2.209945 | 0.110700 | 0.006420       |
| C8                                    | H12 | 2.215752 | 0.106100 | 0.001550       |
| C9                                    | H14 | 2.218945 | 0.106300 | 0.004100       |
| C9                                    | H17 | 2.220937 | 0.106400 | 0.006420       |
| N5                                    | C8  | 2.334353 | 0.074500 | 0.013960       |
| N2                                    | C4  | 2.335414 | 0.070300 | -0.004750      |
| C6                                    | C7  | 2.350641 | 0.065300 | 0.002970       |
| H15                                   | H19 | 2.365416 | 0.211200 | -0.019570      |
| N1                                    | N3  | 2.367896 | 0.043700 | 0.005890       |
| N5                                    | C9  | 2.373728 | 0.080200 | 0.021910       |
| H16                                   | H18 | 2.406176 | 0.191600 | -0.046190      |
| C6                                    | C9  | 2.410077 | 0.076900 | 0.028920       |
| H14                                   | H18 | 2.419848 | 0.181500 | -0.032270      |
| C7                                    | C8  | 2.425558 | 0.071700 | 0.034550       |
| H12                                   | H16 | 2.433680 | 0.179000 | -0.016510      |

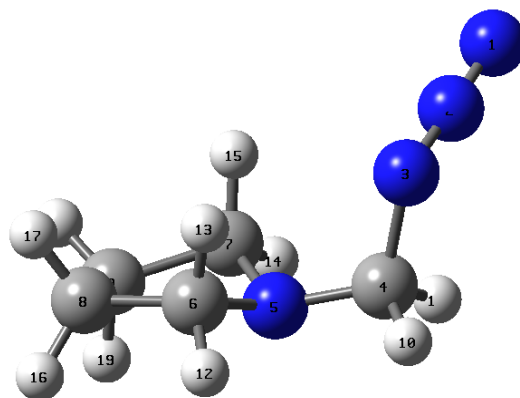

|     |     |          |          |           |
|-----|-----|----------|----------|-----------|
| H13 | H17 | 2.434190 | 0.206500 | -0.001220 |
| H17 | H19 | 2.442933 | 0.186500 | -0.044510 |
| N3  | N5  | 2.459428 | 0.067000 | 0.001630  |
| N2  | H11 | 2.466123 | 0.156300 | -0.026420 |
| C4  | C7  | 2.468499 | 0.068800 | -0.005930 |
| C4  | C6  | 2.477566 | 0.068700 | -0.007320 |
| H11 | H12 | 2.479229 | 0.215900 | -0.016080 |
| C6  | H11 | 2.617337 | 0.150300 | 0.000650  |
| C4  | H15 | 2.725536 | 0.171100 | -0.004780 |
| H10 | H14 | 2.727389 | 0.221700 | -0.025030 |
| N5  | H16 | 2.753764 | 0.283700 | 0.052760  |
| C7  | H13 | 2.758886 | 0.148900 | 0.006450  |
| H12 | H17 | 2.763091 | 0.179000 | 0.001340  |
| N3  | H15 | 2.764010 | 0.234800 | -0.023320 |
| C7  | H10 | 2.789927 | 0.150300 | -0.001780 |
| H13 | H15 | 2.800230 | 0.267800 | 0.001910  |
| C4  | H12 | 2.800513 | 0.139600 | -0.012080 |
| C4  | H13 | 2.804426 | 0.153600 | -0.003750 |
| C6  | H15 | 2.820553 | 0.191700 | 0.013070  |
| C4  | H14 | 2.832221 | 0.148500 | -0.011630 |
| H17 | H18 | 2.850999 | 0.207200 | 0.035580  |
| C9  | H13 | 2.863672 | 0.241300 | 0.057010  |
| N2  | H13 | 2.869667 | 0.254100 | -0.006990 |
| H14 | H19 | 2.876141 | 0.200400 | 0.011110  |
| N3  | H13 | 2.885937 | 0.227700 | -0.021430 |
| H15 | H18 | 2.984287 | 0.146700 | 0.037600  |
| H16 | H19 | 2.987578 | 0.181800 | 0.040920  |
| N5  | H18 | 2.994429 | 0.325000 | 0.074040  |
| H11 | H13 | 3.016606 | 0.221400 | 0.011160  |
| C7  | H16 | 3.018989 | 0.239500 | 0.083350  |
| C6  | H19 | 3.025369 | 0.290500 | 0.084430  |
| H13 | H16 | 3.048283 | 0.132800 | 0.030200  |
| C8  | H15 | 3.054627 | 0.253400 | 0.069050  |
| H10 | H15 | 3.056055 | 0.267300 | 0.013530  |
| H13 | H19 | 3.074545 | 0.567400 | 0.161460  |
| N3  | C7  | 3.078911 | 0.128600 | -0.002790 |
| N2  | H10 | 3.079435 | 0.110600 | 0.007120  |
| N3  | C6  | 3.128107 | 0.130400 | -0.011120 |
| N2  | N5  | 3.180047 | 0.120300 | 0.011150  |
| N5  | H19 | 3.180659 | 0.145900 | 0.059850  |
| C6  | H18 | 3.214693 | 0.209500 | 0.074910  |
| C7  | H17 | 3.247151 | 0.228800 | 0.079310  |
| C8  | H14 | 3.253309 | 0.149700 | 0.066150  |
| N5  | H17 | 3.272676 | 0.112800 | 0.040100  |
| C6  | H14 | 3.284183 | 0.098600 | 0.017270  |
| N1  | H11 | 3.289395 | 0.214300 | -0.073790 |
| C7  | H12 | 3.316946 | 0.098300 | 0.010350  |
| N1  | H13 | 3.343282 | 0.353300 | 0.004590  |
| C7  | H11 | 3.351665 | 0.100200 | 0.007490  |
| C9  | H12 | 3.353890 | 0.112700 | 0.048060  |
| N2  | C6  | 3.364497 | 0.191500 | -0.003850 |
| N1  | C4  | 3.393121 | 0.097700 | -0.024900 |
| C6  | H10 | 3.433240 | 0.100200 | 0.005450  |
| H14 | H16 | 3.567998 | 0.443600 | 0.147590  |
| N3  | H12 | 3.574538 | 0.197000 | -0.010130 |
| N3  | H14 | 3.579063 | 0.225100 | 0.009000  |
| N2  | H12 | 3.580520 | 0.284600 | -0.020840 |
| H15 | H17 | 3.595099 | 0.529400 | 0.155930  |
| N2  | H15 | 3.648122 | 0.271400 | 0.026470  |
| C4  | C8  | 3.671052 | 0.073100 | 0.013900  |
| C4  | C9  | 3.687264 | 0.073600 | 0.026910  |
| H11 | H15 | 3.719683 | 0.172500 | 0.009580  |
| H11 | H14 | 3.750713 | 0.161900 | 0.002420  |

|     |     |          |          |           |
|-----|-----|----------|----------|-----------|
| H10 | H12 | 3.762994 | 0.157500 | 0.004020  |
| H13 | H14 | 3.805292 | 0.164400 | 0.023860  |
| H10 | H13 | 3.840925 | 0.168400 | 0.007680  |
| H13 | H18 | 3.844733 | 0.181300 | 0.101890  |
| H12 | H15 | 3.856533 | 0.187300 | 0.017360  |
| H15 | H16 | 3.862933 | 0.181600 | 0.112750  |
| C8  | H11 | 3.959185 | 0.148400 | 0.015610  |
| N2  | C7  | 3.981868 | 0.170100 | 0.032430  |
| H12 | H18 | 3.982551 | 0.355600 | 0.115460  |
| N1  | C6  | 4.012340 | 0.290500 | -0.018830 |
| H12 | H19 | 4.033403 | 0.256000 | 0.108320  |
| N1  | H12 | 4.060749 | 0.386000 | -0.064350 |
| C4  | H16 | 4.072433 | 0.281900 | 0.046470  |
| H12 | H14 | 4.125594 | 0.136200 | 0.019940  |
| H14 | H17 | 4.136774 | 0.192000 | 0.121740  |
| N1  | N5  | 4.141038 | 0.177800 | -0.003100 |
| N1  | H10 | 4.160874 | 0.132100 | -0.002030 |
| C9  | H10 | 4.169762 | 0.152900 | 0.030060  |
| H11 | H16 | 4.201303 | 0.310800 | 0.029380  |
| C4  | H18 | 4.299907 | 0.324300 | 0.077320  |
| N3  | C9  | 4.323364 | 0.144700 | 0.029790  |
| C9  | H11 | 4.333511 | 0.127300 | 0.043200  |
| C4  | H19 | 4.369255 | 0.208600 | 0.075660  |
| N3  | C8  | 4.396525 | 0.125800 | 0.011930  |
| C8  | H10 | 4.419928 | 0.123400 | 0.030960  |
| C4  | H17 | 4.523664 | 0.142100 | 0.042200  |
| H10 | H18 | 4.605331 | 0.375600 | 0.067040  |
| N1  | H15 | 4.607186 | 0.330600 | 0.066360  |
| N2  | H14 | 4.641157 | 0.217100 | 0.041400  |
| N3  | H19 | 4.687997 | 0.394300 | 0.083490  |
| H10 | H16 | 4.705064 | 0.359500 | 0.074340  |
| H11 | H17 | 4.774094 | 0.176200 | 0.038790  |
| N2  | C8  | 4.779010 | 0.192600 | 0.020250  |
| H10 | H19 | 4.888180 | 0.194400 | 0.071390  |
| H11 | H18 | 4.899648 | 0.416300 | 0.106510  |
| N1  | C7  | 4.977047 | 0.229100 | 0.050270  |
| N2  | C9  | 4.998156 | 0.220600 | 0.069320  |
| N3  | H17 | 5.022338 | 0.280800 | 0.036450  |
| N3  | H16 | 5.059141 | 0.201900 | 0.048150  |
| H11 | H19 | 5.081173 | 0.223700 | 0.102480  |
| N3  | H18 | 5.133012 | 0.200900 | 0.079520  |
| N2  | H17 | 5.243568 | 0.300800 | 0.030570  |
| N2  | H19 | 5.274323 | 0.526600 | 0.154270  |
| H10 | H17 | 5.349182 | 0.168300 | 0.069140  |
| N1  | C8  | 5.436293 | 0.313500 | 0.011250  |
| N2  | H16 | 5.470834 | 0.229800 | 0.038060  |
| N1  | H14 | 5.711586 | 0.234400 | 0.060910  |
| N1  | H17 | 5.742546 | 0.408800 | 0.017500  |
| N1  | C9  | 5.831073 | 0.323900 | 0.090440  |
| N2  | H18 | 5.890825 | 0.212800 | 0.122110  |
| N1  | H19 | 6.016964 | 0.648200 | 0.203790  |
| N1  | H16 | 6.142668 | 0.326900 | 0.006480  |
| N1  | H18 | 6.768680 | 0.281000 | 0.141990  |

***gauche-anti* conformer**

|    |     |          |          |          |
|----|-----|----------|----------|----------|
| C2 | H14 | 1.106853 | 0.076200 | 0.001420 |
| C3 | H16 | 1.106853 | 0.076300 | 0.001420 |
| C3 | H15 | 1.107134 | 0.076400 | 0.001370 |
| C2 | H13 | 1.107144 | 0.076300 | 0.001360 |
| C4 | H17 | 1.109119 | 0.076300 | 0.001320 |
| C1 | H11 | 1.109119 | 0.076300 | 0.001320 |
| C6 | H19 | 1.110661 | 0.076700 | 0.001380 |
| C6 | H20 | 1.110661 | 0.076700 | 0.001380 |

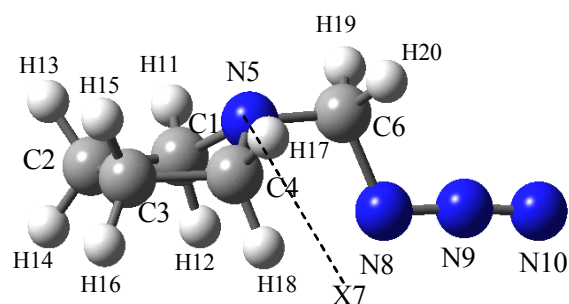



|     |     |          |          |           |
|-----|-----|----------|----------|-----------|
| C4  | H18 | 1.116929 | 0.077600 | 0.001000  |
| C1  | H12 | 1.116929 | 0.077600 | 0.001000  |
| N10 | N9  | 1.147298 | 0.033800 | 0.000490  |
| N9  | N8  | 1.228776 | 0.037700 | -0.001860 |
| C6  | N5  | 1.395612 | 0.047400 | -0.002290 |
| N5  | C1  | 1.479361 | 0.049500 | -0.005010 |
| N5  | C4  | 1.479361 | 0.049500 | -0.005010 |
| N8  | C6  | 1.506911 | 0.057000 | 0.005390  |
| C1  | C2  | 1.537657 | 0.054900 | 0.002500  |
| C4  | C3  | 1.537657 | 0.054900 | 0.002500  |
| C2  | C3  | 1.550357 | 0.052200 | 0.007790  |
| H15 | H16 | 1.782619 | 0.122800 | 0.003860  |
| H13 | H14 | 1.782629 | 0.122800 | 0.003850  |
| H11 | H12 | 1.796958 | 0.122200 | 0.004720  |
| H17 | H18 | 1.796958 | 0.122200 | 0.004720  |
| H19 | H20 | 1.804043 | 0.122100 | 0.008910  |
| N5  | H19 | 2.047597 | 0.101000 | 0.006450  |
| N5  | H20 | 2.047597 | 0.101000 | 0.006450  |
| N8  | H20 | 2.129014 | 0.104800 | 0.005510  |
| N8  | H19 | 2.129014 | 0.104800 | 0.005510  |
| N5  | H17 | 2.136299 | 0.103400 | -0.004440 |
| N5  | H11 | 2.136299 | 0.103400 | -0.004440 |
| N5  | H12 | 2.147816 | 0.102000 | -0.000240 |
| N5  | H18 | 2.147816 | 0.102000 | -0.000240 |
| C1  | H13 | 2.186158 | 0.120700 | 0.004370  |
| C4  | H15 | 2.186158 | 0.120700 | 0.004370  |
| C3  | H13 | 2.194361 | 0.107700 | 0.009250  |
| C2  | H15 | 2.194361 | 0.107800 | 0.009250  |
| C4  | H16 | 2.198973 | 0.107400 | 0.001750  |
| C1  | H14 | 2.198973 | 0.107300 | 0.001750  |
| C2  | H12 | 2.203203 | 0.107000 | 0.008500  |
| C3  | H18 | 2.203203 | 0.107000 | 0.008500  |
| C3  | H17 | 2.214924 | 0.106500 | 0.001470  |
| C2  | H11 | 2.214924 | 0.106500 | 0.001470  |
| C3  | H14 | 2.222361 | 0.108300 | 0.006150  |
| C2  | H16 | 2.222361 | 0.108400 | 0.006150  |
| N9  | C6  | 2.328943 | 0.073000 | -0.010680 |
| N5  | C2  | 2.341638 | 0.085700 | 0.023870  |
| N5  | C3  | 2.341648 | 0.085700 | 0.023860  |
| C1  | C4  | 2.352799 | 0.062800 | 0.002530  |
| N10 | N8  | 2.366772 | 0.043300 | 0.006660  |
| H13 | H15 | 2.398981 | 0.187800 | -0.071140 |
| N8  | N5  | 2.410825 | 0.065000 | 0.006680  |
| C4  | C2  | 2.414014 | 0.075800 | 0.044040  |
| C1  | C3  | 2.414014 | 0.075800 | 0.044040  |
| H18 | H16 | 2.419406 | 0.220800 | -0.017160 |
| H12 | H14 | 2.419416 | 0.220800 | -0.017170 |
| H17 | H15 | 2.430254 | 0.180000 | -0.037980 |
| H11 | H13 | 2.430264 | 0.180000 | -0.037990 |
| H14 | H16 | 2.465359 | 0.186700 | -0.066360 |
| C6  | C4  | 2.466971 | 0.067900 | -0.010690 |
| C6  | C1  | 2.466971 | 0.067900 | -0.010690 |
| H19 | H11 | 2.597747 | 0.218600 | -0.028940 |
| H20 | H17 | 2.597757 | 0.218600 | -0.028950 |
| N9  | H19 | 2.627497 | 0.224000 | -0.022110 |
| N9  | H20 | 2.627497 | 0.224000 | -0.022110 |
| C4  | H20 | 2.700625 | 0.151200 | -0.002940 |
| C1  | H19 | 2.700625 | 0.151200 | -0.002940 |
| N8  | H12 | 2.736134 | 0.227900 | -0.022930 |
| N8  | H18 | 2.736144 | 0.227900 | -0.022940 |
| C6  | H18 | 2.754198 | 0.167300 | -0.009010 |
| C6  | H12 | 2.754198 | 0.167200 | -0.009010 |
| H12 | H18 | 2.775169 | 0.240000 | -0.012450 |

|     |     |          |          |           |
|-----|-----|----------|----------|-----------|
| C4  | H12 | 2.777447 | 0.168200 | 0.007670  |
| C1  | H18 | 2.777447 | 0.168200 | 0.007670  |
| H11 | H14 | 2.810087 | 0.207400 | 0.004100  |
| H17 | H16 | 2.810087 | 0.207400 | 0.004100  |
| C6  | H17 | 2.811449 | 0.144300 | -0.019830 |
| C6  | H11 | 2.811449 | 0.144300 | -0.019830 |
| N5  | H13 | 2.837012 | 0.360600 | 0.086140  |
| N5  | H15 | 2.837022 | 0.360600 | 0.086130  |
| H14 | H15 | 2.914921 | 0.213400 | 0.047510  |
| H13 | H16 | 2.914921 | 0.213500 | 0.047510  |
| C3  | H12 | 2.947649 | 0.280500 | 0.084900  |
| C2  | H18 | 2.947649 | 0.280500 | 0.084900  |
| H12 | H13 | 3.028145 | 0.139000 | 0.040480  |
| H18 | H15 | 3.028145 | 0.138900 | 0.040480  |
| H20 | H18 | 3.032235 | 0.255200 | 0.010550  |
| H19 | H12 | 3.032235 | 0.255200 | 0.010550  |
| N8  | C1  | 3.032431 | 0.125600 | -0.003910 |
| N8  | C4  | 3.032431 | 0.125600 | -0.003910 |
| C4  | H13 | 3.099447 | 0.257600 | 0.106990  |
| C1  | H15 | 3.099447 | 0.257600 | 0.106990  |
| C1  | H16 | 3.129864 | 0.294200 | 0.109520  |
| C4  | H14 | 3.129864 | 0.294200 | 0.109520  |
| N5  | H14 | 3.221434 | 0.131000 | 0.063310  |
| N5  | H16 | 3.221444 | 0.130900 | 0.063300  |
| C2  | H17 | 3.300054 | 0.134000 | 0.075030  |
| C3  | H11 | 3.300054 | 0.134000 | 0.075030  |
| H12 | H16 | 3.305257 | 0.638200 | 0.215900  |
| H18 | H14 | 3.305267 | 0.638200 | 0.215890  |
| C1  | H17 | 3.307855 | 0.098700 | 0.012770  |
| C4  | H11 | 3.307855 | 0.098700 | 0.012770  |
| N10 | C6  | 3.388315 | 0.104700 | -0.043990 |
| C4  | H19 | 3.394317 | 0.099900 | 0.003860  |
| C1  | H20 | 3.394317 | 0.099900 | 0.003860  |
| N9  | N5  | 3.472987 | 0.072800 | 0.040820  |
| N8  | H11 | 3.519755 | 0.214700 | -0.000900 |
| N8  | H17 | 3.519755 | 0.214700 | -0.000900 |
| N10 | H20 | 3.520668 | 0.318200 | -0.073780 |
| N10 | H19 | 3.520748 | 0.317800 | -0.073860 |
| C6  | C3  | 3.662793 | 0.076500 | 0.024800  |
| C6  | C2  | 3.662793 | 0.076600 | 0.024800  |
| N9  | H12 | 3.745202 | 0.301300 | 0.068410  |
| N9  | H18 | 3.745212 | 0.301200 | 0.068400  |
| H17 | H13 | 3.748468 | 0.462300 | 0.176090  |
| H11 | H15 | 3.748478 | 0.462200 | 0.176080  |
| H19 | H17 | 3.763536 | 0.159100 | -0.003610 |
| H20 | H11 | 3.763536 | 0.159100 | -0.003610 |
| H19 | H18 | 3.772837 | 0.172100 | 0.004360  |
| H20 | H12 | 3.772837 | 0.172100 | 0.004360  |
| H11 | H18 | 3.820568 | 0.169900 | 0.017850  |
| H12 | H17 | 3.820568 | 0.169900 | 0.017850  |
| H12 | H15 | 3.839378 | 0.181300 | 0.141530  |
| H18 | H13 | 3.839378 | 0.181300 | 0.141530  |
| C3  | H20 | 4.049902 | 0.156200 | 0.027040  |
| C2  | H19 | 4.049902 | 0.156200 | 0.027040  |
| H17 | H14 | 4.078463 | 0.235700 | 0.151750  |
| H11 | H16 | 4.078483 | 0.235500 | 0.151730  |
| N9  | C1  | 4.096818 | 0.187800 | 0.062200  |
| N9  | C4  | 4.096818 | 0.187800 | 0.062200  |
| H11 | H17 | 4.143239 | 0.134800 | 0.014770  |
| C6  | H13 | 4.146965 | 0.356800 | 0.079970  |
| C6  | H15 | 4.146985 | 0.356700 | 0.079950  |
| N8  | C3  | 4.281315 | 0.130300 | 0.032240  |
| N8  | C2  | 4.281315 | 0.130400 | 0.032240  |

|     |     |          |          |          |
|-----|-----|----------|----------|----------|
| H19 | H13 | 4.363557 | 0.394200 | 0.060800 |
| H20 | H15 | 4.363577 | 0.394100 | 0.060780 |
| C2  | H20 | 4.364736 | 0.129900 | 0.045060 |
| C3  | H19 | 4.364736 | 0.129800 | 0.045060 |
| N9  | H11 | 4.428792 | 0.317300 | 0.047850 |
| N9  | H17 | 4.428792 | 0.317300 | 0.047850 |
| C6  | H14 | 4.438746 | 0.184300 | 0.072890 |
| C6  | H16 | 4.438776 | 0.184000 | 0.072860 |
| N10 | N5  | 4.575407 | 0.094800 | 0.043610 |
| N10 | H12 | 4.755648 | 0.375800 | 0.135470 |
| N10 | H18 | 4.755678 | 0.375600 | 0.135440 |
| H20 | H13 | 4.761423 | 0.450800 | 0.116610 |
| H19 | H15 | 4.761443 | 0.450700 | 0.116590 |
| N8  | H14 | 4.776337 | 0.373600 | 0.083230 |
| N8  | H16 | 4.776357 | 0.373400 | 0.083210 |
| H19 | H14 | 4.825450 | 0.184200 | 0.066970 |
| H20 | H16 | 4.825470 | 0.183900 | 0.066950 |
| N8  | H13 | 5.014704 | 0.217800 | 0.085270 |
| N8  | H15 | 5.014734 | 0.217500 | 0.085240 |
| N10 | C4  | 5.163013 | 0.258300 | 0.101220 |
| N10 | C1  | 5.163013 | 0.258200 | 0.101220 |
| H20 | H14 | 5.211979 | 0.204700 | 0.106390 |
| H19 | H16 | 5.212009 | 0.204400 | 0.106360 |
| N9  | C2  | 5.400204 | 0.154800 | 0.111830 |
| N9  | C3  | 5.400214 | 0.154700 | 0.111820 |
| N10 | H17 | 5.409889 | 0.437100 | 0.077530 |
| N10 | H11 | 5.409909 | 0.437000 | 0.077510 |
| N9  | H14 | 5.877591 | 0.397700 | 0.177730 |
| N9  | H16 | 5.877621 | 0.397500 | 0.177700 |
| N9  | H13 | 6.094580 | 0.253000 | 0.154620 |
| N9  | H15 | 6.094620 | 0.252500 | 0.154580 |
| N10 | C3  | 6.481557 | 0.194600 | 0.166910 |
| N10 | C2  | 6.481557 | 0.194800 | 0.166910 |
| N10 | H14 | 6.922529 | 0.437900 | 0.256930 |
| N10 | H16 | 6.922569 | 0.437500 | 0.256890 |
| N10 | H13 | 7.164203 | 0.295500 | 0.197210 |
| N10 | H15 | 7.164243 | 0.295000 | 0.197170 |

**anti-gauche conformer**

|     |     |          |          |           |
|-----|-----|----------|----------|-----------|
| C7  | H14 | 1.106710 | 0.076100 | 0.001350  |
| C9  | H19 | 1.106977 | 0.076100 | 0.001330  |
| C9  | H18 | 1.107002 | 0.076100 | 0.001420  |
| C8  | H16 | 1.107003 | 0.076100 | 0.001330  |
| C8  | H17 | 1.107020 | 0.076100 | 0.001410  |
| C6  | H12 | 1.108607 | 0.076300 | 0.001340  |
| C4  | H11 | 1.111755 | 0.076900 | 0.001240  |
| C4  | H10 | 1.116846 | 0.077500 | 0.000790  |
| C6  | H13 | 1.121807 | 0.078300 | 0.001090  |
| C7  | H15 | 1.121852 | 0.078300 | 0.001110  |
| N1  | N2  | 1.142482 | 0.033700 | 0.000270  |
| N2  | N3  | 1.237190 | 0.038400 | -0.001870 |
| C4  | N5  | 1.423641 | 0.048200 | -0.000310 |
| N3  | C4  | 1.463023 | 0.051300 | 0.002610  |
| N5  | C6  | 1.477236 | 0.049500 | -0.002790 |
| N5  | C7  | 1.477877 | 0.049600 | -0.002780 |
| C7  | C9  | 1.537125 | 0.053200 | 0.001930  |
| C6  | C8  | 1.538748 | 0.053100 | 0.001410  |
| C8  | C9  | 1.552390 | 0.052100 | 0.004860  |
| H18 | H19 | 1.780351 | 0.122500 | 0.005960  |
| H16 | H17 | 1.781300 | 0.122400 | 0.005960  |
| H14 | H15 | 1.793895 | 0.122500 | 0.005950  |
| H12 | H13 | 1.797073 | 0.122500 | 0.005980  |
| H10 | H11 | 1.798714 | 0.122400 | 0.008450  |

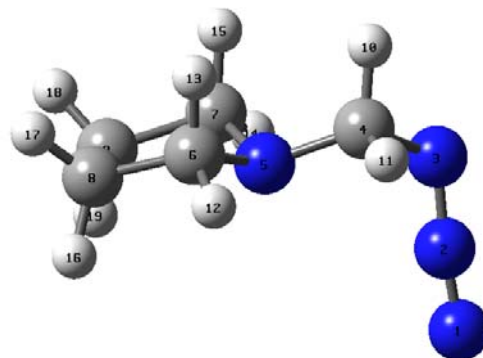

|     |     |          |          |           |
|-----|-----|----------|----------|-----------|
| N3  | H10 | 2.043804 | 0.103700 | 0.006810  |
| N5  | H11 | 2.057890 | 0.101900 | 0.005330  |
| N3  | H11 | 2.117151 | 0.102900 | 0.005290  |
| N5  | H10 | 2.117924 | 0.101000 | 0.005320  |
| N5  | H12 | 2.135701 | 0.103300 | -0.000110 |
| N5  | H14 | 2.137595 | 0.102900 | -0.000440 |
| N5  | H15 | 2.144217 | 0.102300 | 0.003150  |
| N5  | H13 | 2.152233 | 0.102100 | 0.003280  |
| C6  | H16 | 2.182766 | 0.115100 | 0.005520  |
| C7  | H19 | 2.183147 | 0.115000 | 0.006260  |
| C8  | H13 | 2.193820 | 0.107000 | 0.007080  |
| C7  | H18 | 2.195710 | 0.107400 | 0.004550  |
| C6  | H17 | 2.197432 | 0.107300 | 0.004000  |
| C9  | H16 | 2.198056 | 0.107200 | 0.008420  |
| C9  | H15 | 2.198189 | 0.107500 | 0.007450  |
| C8  | H19 | 2.199364 | 0.106700 | 0.008710  |
| C9  | H14 | 2.215217 | 0.106000 | 0.003640  |
| C8  | H12 | 2.217740 | 0.106100 | 0.002840  |
| C9  | H17 | 2.221942 | 0.107500 | 0.006450  |
| C8  | H18 | 2.222296 | 0.108100 | 0.006800  |
| N2  | C4  | 2.290229 | 0.065500 | -0.002010 |
| C6  | C7  | 2.330021 | 0.062300 | 0.002460  |
| N5  | C8  | 2.356934 | 0.076600 | 0.014530  |
| N5  | C9  | 2.357584 | 0.077500 | 0.015930  |
| N1  | N3  | 2.368363 | 0.044000 | 0.006000  |
| H16 | H19 | 2.381693 | 0.185800 | -0.041870 |
| H13 | H17 | 2.394082 | 0.205500 | -0.005770 |
| H15 | H18 | 2.404308 | 0.205900 | -0.007290 |
| N3  | N5  | 2.406377 | 0.064900 | 0.004460  |
| H12 | H16 | 2.420065 | 0.177300 | -0.018900 |
| C7  | C8  | 2.420210 | 0.071200 | 0.027360  |
| H14 | H19 | 2.423435 | 0.178000 | -0.018710 |
| C6  | C9  | 2.425135 | 0.071300 | 0.027350  |
| H17 | H18 | 2.439180 | 0.185500 | -0.038350 |
| C4  | C6  | 2.446104 | 0.073100 | -0.004180 |
| H10 | H15 | 2.459033 | 0.240800 | -0.017350 |
| C4  | C7  | 2.461268 | 0.069100 | -0.004650 |
| H11 | H12 | 2.508712 | 0.210400 | -0.023970 |
| C6  | H11 | 2.584625 | 0.149000 | -0.006140 |
| N2  | H11 | 2.621300 | 0.172500 | -0.004450 |
| H10 | H13 | 2.667441 | 0.268900 | 0.007310  |
| H13 | H15 | 2.679674 | 0.236800 | 0.000480  |
| C4  | H13 | 2.689668 | 0.169000 | 0.000730  |
| C4  | H15 | 2.694894 | 0.164100 | -0.001160 |
| C7  | H10 | 2.697892 | 0.153600 | -0.005840 |
| C6  | H15 | 2.727079 | 0.162600 | 0.009740  |
| C7  | H13 | 2.735974 | 0.156100 | 0.008930  |
| H14 | H18 | 2.794860 | 0.185800 | 0.008010  |
| H12 | H17 | 2.800900 | 0.185000 | 0.006730  |
| H11 | H13 | 2.805482 | 0.244800 | 0.006480  |
| C4  | H12 | 2.806733 | 0.140300 | -0.007390 |
| C4  | H14 | 2.828521 | 0.140700 | -0.007890 |
| N2  | N5  | 2.841024 | 0.154900 | 0.000180  |
| C6  | H10 | 2.858958 | 0.168600 | 0.009020  |
| N5  | H19 | 2.862117 | 0.294200 | 0.059580  |
| N5  | H16 | 2.863087 | 0.291300 | 0.055600  |
| N3  | H14 | 2.865296 | 0.202900 | -0.010990 |
| H16 | H18 | 2.932268 | 0.184400 | 0.035620  |
| H17 | H19 | 2.932931 | 0.189600 | 0.035550  |
| C8  | H15 | 2.945623 | 0.236500 | 0.055850  |
| C9  | H13 | 2.953692 | 0.231400 | 0.054170  |
| H13 | H16 | 3.032942 | 0.135200 | 0.030530  |
| H15 | H19 | 3.038105 | 0.136200 | 0.032480  |

|     |     |          |          |           |
|-----|-----|----------|----------|-----------|
| N3  | C7  | 3.047284 | 0.133700 | 0.008760  |
| C7  | H16 | 3.128804 | 0.217600 | 0.070120  |
| H10 | H14 | 3.130971 | 0.223800 | -0.002160 |
| C6  | H19 | 3.132393 | 0.214300 | 0.071380  |
| N2  | H10 | 3.142074 | 0.100400 | 0.019530  |
| C7  | H17 | 3.157570 | 0.239700 | 0.071280  |
| C6  | H18 | 3.161872 | 0.243900 | 0.072590  |
| N2  | H14 | 3.219501 | 0.370400 | 0.051360  |
| N5  | H18 | 3.250164 | 0.123700 | 0.046120  |
| N5  | H17 | 3.251429 | 0.120300 | 0.042790  |
| C6  | H14 | 3.298917 | 0.096900 | 0.012000  |
| C7  | H12 | 3.299027 | 0.097400 | 0.011420  |
| C8  | H14 | 3.329163 | 0.123700 | 0.049320  |
| C9  | H12 | 3.333175 | 0.121500 | 0.048140  |
| H15 | H17 | 3.345352 | 0.512400 | 0.138210  |
| N1  | C4  | 3.349658 | 0.090500 | -0.014920 |
| H13 | H18 | 3.353136 | 0.509900 | 0.137370  |
| N3  | H15 | 3.362841 | 0.258100 | 0.032100  |
| C7  | H11 | 3.377359 | 0.101400 | 0.007430  |
| H10 | H12 | 3.384776 | 0.215600 | 0.016150  |
| N1  | H11 | 3.518574 | 0.234300 | -0.026610 |
| N2  | C7  | 3.564540 | 0.268200 | 0.042930  |
| H11 | H15 | 3.645380 | 0.175700 | 0.009660  |
| C4  | C8  | 3.677828 | 0.071300 | 0.017910  |
| N1  | N5  | 3.682714 | 0.233200 | -0.023050 |
| C4  | C9  | 3.684208 | 0.070900 | 0.019360  |
| N3  | C6  | 3.731135 | 0.071000 | 0.009020  |
| H12 | H15 | 3.776110 | 0.168500 | 0.018590  |
| H13 | H14 | 3.782568 | 0.165200 | 0.019130  |
| H14 | H16 | 3.826895 | 0.375300 | 0.114190  |
| H12 | H19 | 3.828490 | 0.367400 | 0.113440  |
| H11 | H14 | 3.833900 | 0.153900 | 0.008780  |
| H15 | H16 | 3.861272 | 0.178100 | 0.095310  |
| H13 | H19 | 3.866416 | 0.177700 | 0.096020  |
| N1  | H14 | 3.887187 | 0.528300 | 0.103220  |
| C9  | H10 | 4.007841 | 0.153700 | 0.021040  |
| C8  | H11 | 4.010521 | 0.144000 | 0.013670  |
| N3  | H12 | 4.054564 | 0.150000 | 0.003060  |
| C8  | H10 | 4.079341 | 0.161700 | 0.028050  |
| N3  | H13 | 4.097367 | 0.168600 | 0.019440  |
| H14 | H17 | 4.125633 | 0.209200 | 0.100930  |
| H12 | H18 | 4.130870 | 0.213700 | 0.100760  |
| N2  | C6  | 4.144256 | 0.149400 | 0.000900  |
| H12 | H14 | 4.155303 | 0.133200 | 0.016540  |
| N2  | H15 | 4.163834 | 0.307800 | 0.071100  |
| C4  | H16 | 4.201952 | 0.275900 | 0.054020  |
| C4  | H19 | 4.207630 | 0.279800 | 0.058770  |
| N1  | H10 | 4.256364 | 0.108900 | 0.022610  |
| N2  | H12 | 4.275403 | 0.232700 | -0.016770 |
| N1  | C7  | 4.358301 | 0.393400 | 0.059420  |
| C9  | H11 | 4.373459 | 0.121200 | 0.032590  |
| H11 | H16 | 4.403263 | 0.299300 | 0.034030  |
| N3  | C9  | 4.410783 | 0.126000 | 0.026560  |
| C4  | H17 | 4.447126 | 0.172800 | 0.050960  |
| C4  | H18 | 4.452666 | 0.177800 | 0.054980  |
| H10 | H18 | 4.556166 | 0.309700 | 0.052340  |
| H10 | H17 | 4.650786 | 0.323500 | 0.063730  |
| N3  | H19 | 4.696700 | 0.320500 | 0.044650  |
| N2  | C9  | 4.709943 | 0.289900 | 0.045540  |
| H10 | H19 | 4.713585 | 0.219600 | 0.059860  |
| H11 | H17 | 4.736211 | 0.187700 | 0.038060  |
| N3  | C8  | 4.736552 | 0.097000 | 0.037030  |
| N2  | H19 | 4.742694 | 0.495300 | 0.059780  |

|     |     |          |          |           |
|-----|-----|----------|----------|-----------|
| N2  | H13 | 4.751651 | 0.161500 | 0.023750  |
| H10 | H16 | 4.805417 | 0.225800 | 0.067540  |
| H11 | H19 | 4.868566 | 0.352600 | 0.084060  |
| N1  | H12 | 4.899041 | 0.331800 | -0.060370 |
| N1  | C6  | 4.899529 | 0.246900 | -0.028820 |
| N2  | C8  | 5.004828 | 0.237400 | 0.034580  |
| N1  | H15 | 5.092962 | 0.385400 | 0.094450  |
| N1  | H19 | 5.125055 | 0.684300 | 0.068070  |
| N3  | H16 | 5.127053 | 0.376000 | 0.081700  |
| N2  | H16 | 5.146999 | 0.518600 | 0.071950  |
| H11 | H18 | 5.190154 | 0.209200 | 0.077950  |
| N3  | H18 | 5.192278 | 0.169500 | 0.060950  |
| N1  | C9  | 5.305632 | 0.464600 | 0.053520  |
| N1  | H16 | 5.551598 | 0.660900 | 0.032880  |
| N2  | H18 | 5.603725 | 0.312900 | 0.097000  |
| N1  | C8  | 5.603866 | 0.386700 | 0.011490  |
| N3  | H17 | 5.606041 | 0.166200 | 0.083900  |
| N1  | H13 | 5.633069 | 0.213900 | 0.008320  |
| N2  | H17 | 5.978465 | 0.220500 | 0.087010  |
| N1  | H18 | 6.235056 | 0.504400 | 0.124880  |
| N1  | H17 | 6.620525 | 0.370600 | 0.071850  |

**Table S8** Least-squares correlation matrix ( $\times 100$ ) from the refinement of AMP

|                                          | 1         | 2   | 3          | 4   | 5          | 6          | 7          | 8          | 9   | 10         | 11        | 12         | 13  | 14         | 15         | 16        | 17  |
|------------------------------------------|-----------|-----|------------|-----|------------|------------|------------|------------|-----|------------|-----------|------------|-----|------------|------------|-----------|-----|
| 1 $k_1^a$                                | 100       |     |            |     |            |            |            |            |     |            |           |            |     |            |            |           |     |
| 2 $k_2^a$                                | <b>52</b> | 100 |            |     |            |            |            |            |     |            |           |            |     |            |            |           |     |
| 3 N1-N2                                  | 30        | 22  | 100        |     |            |            |            |            |     |            |           |            |     |            |            |           |     |
| 4 N2-N3                                  | 20        | 45  | -14        | 100 |            |            |            |            |     |            |           |            |     |            |            |           |     |
| 5 C4-N3                                  | -10       | -4  | -15        | 9   | 100        |            |            |            |     |            |           |            |     |            |            |           |     |
| 6 C4-N5                                  | -27       | -31 | -32        | 34  | -32        | 100        |            |            |     |            |           |            |     |            |            |           |     |
| 7 C6-N5, C7-N5 <sup>b</sup>              | 6         | -3  | 17         | -16 | <b>-99</b> | 27         | 100        |            |     |            |           |            |     |            |            |           |     |
| 8 C6-C8, C7-C9, C8-C9 <sup>b</sup>       | 24        | 37  | -2         | 42  | <b>-62</b> | <b>52</b>  | <b>53</b>  | 100        |     |            |           |            |     |            |            |           |     |
| 9 C-H <sup>b</sup>                       | -39       | -28 | <b>-65</b> | 28  | 20         | 43         | -22        | -4         | 100 |            |           |            |     |            |            |           |     |
| 10 C4-N3-N2, N3-C4-N5 <sup>b</sup>       | 2         | -1  | 16         | -20 | <b>-86</b> | 20         | <b>86</b>  | 46         | -25 | 100        |           |            |     |            |            |           |     |
| 11 C4-N5-C6, C4-N5-C7 <sup>b</sup>       | 10        | 12  | 3          | 7   | 42         | -36        | -42        | -33        | 6   | <b>-66</b> | 100       |            |     |            |            |           |     |
| 12 C8-C6-N5                              | 16        | 23  | 2          | -6  | <b>71</b>  | <b>-63</b> | <b>-71</b> | <b>-53</b> | -8  | <b>-51</b> | 9         | 100        |     |            |            |           |     |
| 13 N1-N2-N3-C4                           | 5         | 2   | 6          | -4  | 1          | -5         | 0          | -5         | -6  | 0          | -26       | 16         | 100 |            |            |           |     |
| 14 N2-N3-C4-N5                           | 8         | 16  | 0          | 13  | 44         | -21        | -44        | -21        | 5   | <b>-67</b> | 47        | 37         | 23  | 100        |            |           |     |
| 15 C6-N5-C4-N3, C7-N5-C4-N3 <sup>b</sup> | 10        | 9   | -19        | 20  | 37         | -2         | -39        | -9         | 26  | <b>-71</b> | <b>75</b> | -2         | -7  | 49         | 100        |           |     |
| 16 C7-N5-C6-C8                           | 5         | 8   | 24         | 16  | <b>-76</b> | 39         | <b>75</b>  | <b>62</b>  | -20 | <b>76</b>  | -38       | <b>-71</b> | -15 | <b>-52</b> | <b>-50</b> | 100       |     |
| 17 C6-C8-C7-C9                           | 1         | 2   | 8          | 30  | -33        | 40         | 31         | 40         | 6   | 13         | 17        | <b>-64</b> | -25 | -15        | 15         | <b>67</b> | 100 |

<sup>a</sup>  $k_1$  and  $k_2$  are the scale factors. <sup>b</sup> These parameters were refined in the group.

**Table S9** Experimental coordinates of atoms (in Å) for three conformers of AMP

| Nº                   | Atom | X        | Y        | Z        |
|----------------------|------|----------|----------|----------|
| <i>gauche-gauche</i> |      |          |          |          |
| 1                    | N    | 0.28812  | 0.97930  | 3.17806  |
| 2                    | N    | 0.25457  | 0.13065  | 2.39112  |
| 3                    | N    | 0.31410  | -0.81966 | 1.60686  |
| 4                    | C    | -0.81563 | -0.96790 | 0.63086  |
| 5                    | N    | -0.61477 | -0.43337 | -0.64980 |
| 6                    | C    | -0.38456 | 1.02099  | -0.74552 |
| 7                    | C    | 0.50249  | -0.99909 | -1.43559 |
| 8                    | C    | -0.11768 | 1.21162  | -2.24924 |
| 9                    | C    | 0.57864  | -0.11161 | -2.70029 |
| 10                   | H    | -0.89346 | -2.04711 | 0.46597  |
| 11                   | H    | -1.73690 | -0.59898 | 1.10421  |
| 12                   | H    | -1.26143 | 1.57758  | -0.38913 |
| 13                   | H    | 0.49434  | 1.32774  | -0.14542 |
| 14                   | H    | 0.29716  | -2.04661 | -1.68984 |
| 15                   | H    | 1.44429  | -0.95922 | -0.85741 |
| 16                   | H    | -1.06664 | 1.34539  | -2.78016 |
| 17                   | H    | 0.50693  | 2.08959  | -2.44789 |
| 18                   | H    | 0.05375  | -0.58222 | -3.53849 |
| 19                   | H    | 1.61796  | 0.04786  | -3.00800 |
| <i>gauche-anti</i>   |      |          |          |          |
| 1                    | C    | 0.07872  | 1.16434  | -1.25531 |
| 2                    | C    | 0.27611  | 0.78129  | -2.73651 |
| 3                    | C    | 0.27611  | -0.78129 | -2.73651 |
| 4                    | C    | 0.07872  | -1.16434 | -1.25531 |
| 5                    | N    | -0.64672 | 0.00000  | -0.70617 |
| 6                    | C    | -0.88007 | 0.00000  | 0.66832  |
| 8                    | N    | 0.38773  | 0.00000  | 1.47983  |
| 9                    | N    | 0.24504  | 0.00000  | 2.70289  |
| 10                   | N    | 0.20045  | 0.00000  | 3.86010  |
| 11                   | H    | -0.52013 | 2.07715  | -1.14179 |
| 12                   | H    | 1.04039  | 1.30868  | -0.72850 |
| 13                   | H    | -0.55215 | 1.16485  | -3.34229 |
| 14                   | H    | 1.20532  | 1.19923  | -3.13919 |
| 15                   | H    | -0.55215 | -1.16485 | -3.34229 |
| 16                   | H    | 1.20532  | -1.19923 | -3.13919 |
| 17                   | H    | -0.52013 | -2.07715 | -1.14179 |
| 18                   | H    | 1.04039  | -1.30868 | -0.72850 |
| 19                   | H    | -1.45452 | 0.89939  | 0.93393  |
| 20                   | H    | -1.45452 | -0.89939 | 0.93393  |
| <i>anti-gauche</i>   |      |          |          |          |
| 1                    | N    | 0.80521  | -1.02415 | -2.90100 |
| 2                    | N    | 0.12939  | -0.26057 | -2.36091 |
| 3                    | N    | -0.69463 | 0.52995  | -1.87988 |
| 4                    | C    | -0.27652 | 1.20617  | -0.65202 |
| 5                    | N    | 0.10220  | 0.31110  | 0.38328  |
| 6                    | C    | 0.63737  | 0.98430  | 1.58504  |



---

|    |   |          |          |          |
|----|---|----------|----------|----------|
| 7  | C | -1.00342 | -0.50049 | 0.93507  |
| 8  | C | 0.71789  | -0.16008 | 2.61603  |
| 9  | C | -0.38648 | -1.17300 | 2.17876  |
| 10 | H | -1.14558 | 1.82607  | -0.36472 |
| 11 | H | 0.58045  | 1.86727  | -0.85396 |
| 12 | H | 1.61421  | 1.43694  | 1.37411  |
| 13 | H | -0.05136 | 1.78618  | 1.92554  |
| 14 | H | -1.34822 | -1.24131 | 0.20516  |
| 15 | H | -1.86373 | 0.15119  | 1.19711  |
| 16 | H | 1.70366  | -0.63571 | 2.57373  |
| 17 | H | 0.56682  | 0.20623  | 3.63754  |
| 18 | H | -1.13571 | -1.33102 | 2.96242  |
| 19 | H | 0.03030  | -2.15079 | 1.91450  |

---

**Fig. S1** Experimental intensity curve with final background for long camera distance

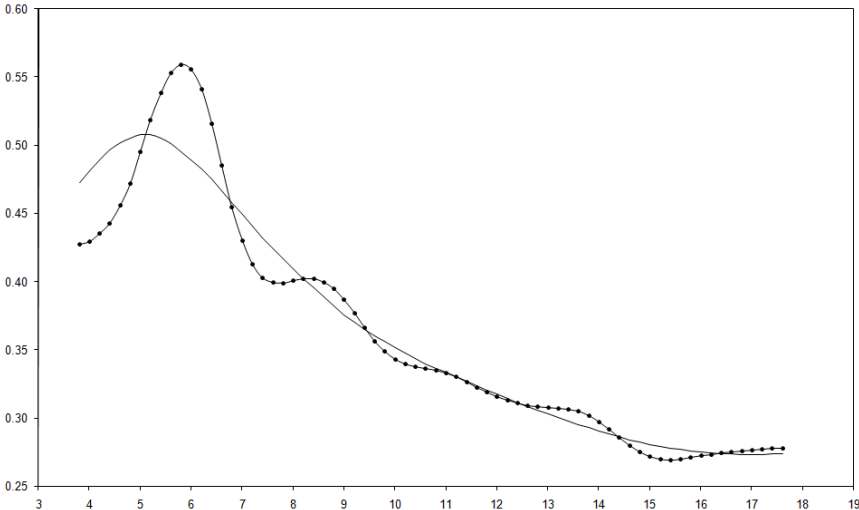

**Fig. S2** Experimental intensity curve with final background for short camera distance

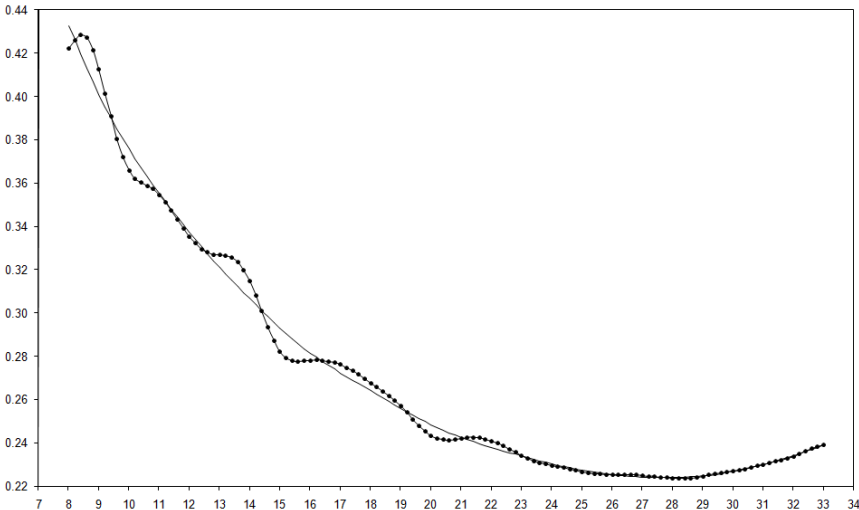

Supplement: c0cp00894j.pdf [file c0cp00894j.pdf]
